# Supplementary material for: <em>Paederia grandidieri</em> Leaf Extracts: Polyphenols and Biological Activities
Source: Preprints.org preprint supplement (doi:10.20944/preprints202411.0032.v1), 2024-11-01
Supplement: Supplementary file 1 [file supplementary]

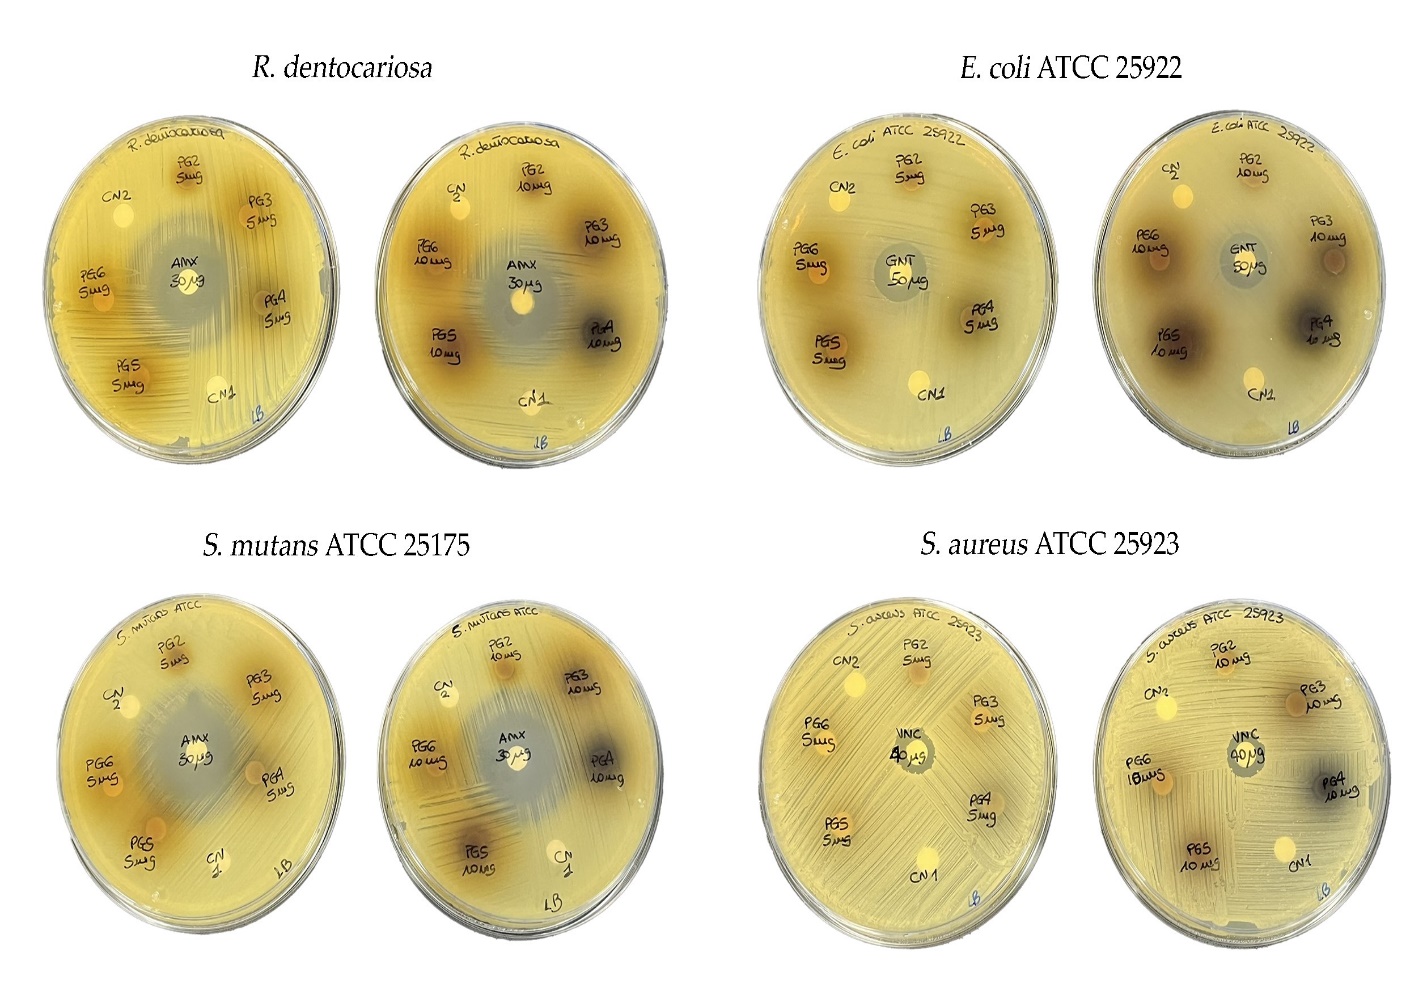


Figure S1. *In vitro* antibacterial activity of *Paederia* *grandidieri* leaf extracts evaluated by the agar well diffusion method. For all tested microorganisms, no inhibition zones were observed around disks filled up with extracts, while the selected positive controls demonstrated an antibacterial effect against the isolates, with mean diameter inhibition zones (MDIZ) values of 21.50 ± 0.71 for amoxicillin against *Rothia dentocariosa*, 22.50 ± 0.71 for amoxicillin against *Streptococcus mutans* ATCC 25175, 15.00 ± 0.00 for gentamicin against *Escherichia coli* ATCC 25922 and 12.50 ± 0.71 for vancomycin against *Staphylococcus aureus* ATCC 25923; no effects were observed for the negative controls.
