# Supplementary material for: <em>Paederia grandidieri</em> Leaf Extracts: Polyphenols and Biological Activities
Source: Preprints.org preprint supplement (doi:10.20944/preprints202411.0032.v1), 2024-11-01
Supplement: Supplementary file 4 [file Table S1.docx]

**Table S1** *In vitro* antibacterial activity of *Paederia grandidieri* extracts evaluated by agar diffusion method.

| **Microorganism** | **Tested concentration** | **Extract type** | | | | | **Positive**  **Control** |
| --- | --- | --- | --- | --- | --- | --- | --- |
| **PG1** | **PG2** | **PG3** | **PG4** | **PG5** |
| *R. dentocariosa* | 5 mg/disk | 0.00 ± 0.00 | 0.00 ± 0.00 | 0.00 ± 0.00 | 0.00 ± 0.00 | 0.00 ± 0.00 | AMX  (30 µg/disk)  21.5 ± 0.71 |
| 10 mg/disk | 0.00 ± 0.00 | 0.00 ± 0.00 | 0.00 ± 0.00 | 0.00 ± 0.00 | 0.00 ± 0.00 |
| *S. mutans* ATCC 25175 | 5 mg/disk | 0.00 ± 0.00 | 0.00 ± 0.00 | 0.00 ± 0.00 | 0.00 ± 0.00 | 0.00 ± 0.00 | AMX  (30 µg/disk)  22.5 ± 0.71 |
| 10 mg/disk | 0.00 ± 0.00 | 0.00 ± 0.00 | 0.00 ± 0.00 | 0.00 ± 0.00 | 0.00 ± 0.00 |
| *E. coli* ATCC 25922 | 5 mg/disk | 0.00 ± 0.00 | 0.00 ± 0.00 | 0.00 ± 0.00 | 0.00 ± 0.00 | 0.00 ± 0.00 | GNT  (50 µg/disk)  15.0 ± 0.00 |
| 10 mg/disk | 0.00 ± 0.00 | 0.00 ± 0.00 | 0.00 ± 0.00 | 0.00 ± 0.00 | 0.00 ± 0.00 |
| *S. aureus* ATCC 25923 | 5 mg/disk | 0.00 ± 0.00 | 0.00 ± 0.00 | 0.00 ± 0.00 | 0.00 ± 0.00 | 0.00 ± 0.00 | VNC  (40 µg/disk)  12.5 ± 0.71 |
| 10 mg/disk | 0.00 ± 0.00 | 0.00 ± 0.00 | 0.00 ± 0.00 | 0.00 ± 0.00 | 0.00 ± 0.00 |

The mean diameter of the inhibition zone (in mm) is reported as the mean of values obtained from assays in triplicate ± standard deviation. PG1, aqueous extract at room temperature for 24h; PG2, aqueous extract at 60°C for 6h; PG3, aqueous extract at 60°C for 24h; PG4, hydro-alcoholic extract at room temperature for 4h; PG5, hydro-alcoholic extract at room temperature for 24h; AMX, amoxicillin; GNT, gentamicin; VNC, vancomycin. Positive controls used, their concentrations and MDIZ ± standard deviation are reported in the column on the far right.
