# Supplementary figures and images for: <em>Paederia grandidieri</em> Leaf Extracts: Polyphenols and Biological Activities
Source: Preprints.org preprint supplement (doi:10.20944/preprints202411.0032.v1), 2024-11-01

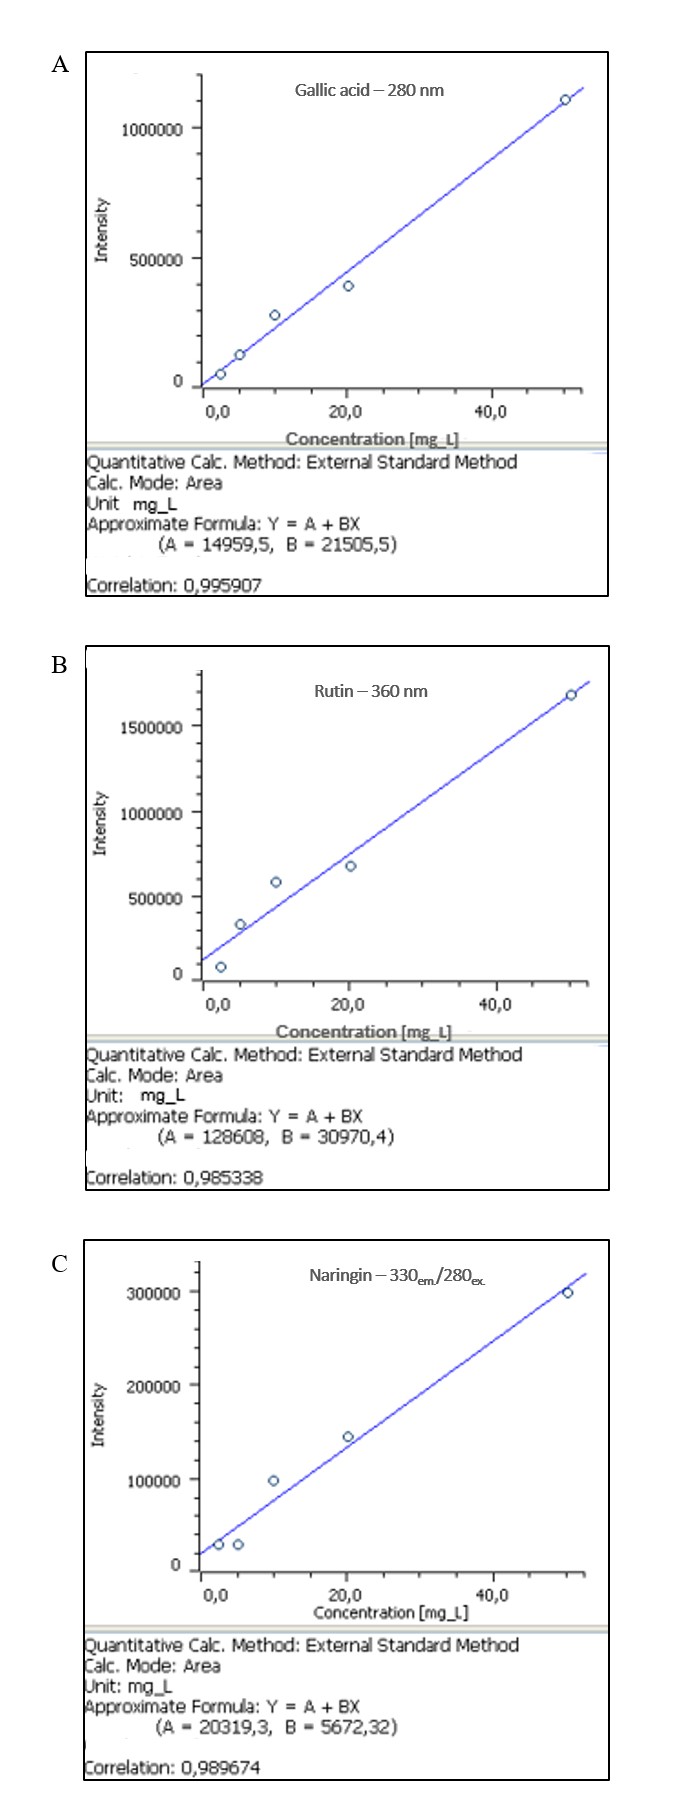


Figure S2 Standard curves of A) gallic acid, B) rutin and C) naringin at concentrations of 2.5, 5, 10, 20 and 50 mg/L.

Supplement: Supplementary file 3 [file Figure S2.docx]
